# Supplementary material for: A Communication Strategy and Brochure for Relatives of Patients Dying in the ICU
Source: Atypon-hosted journal article supplement (doi:10.1056/nejmoa063446), 2007-02-01
Supplement: nejm_lautrette_469sa1.pdf [file nejm_lautrette_469sa1.pdf]

## Supplementary Appendix

This appendix has been provided by the authors to give readers additional information about their work.

Supplement to: Lautrette A, Darmon M, Megarbane B, et al. A communication strategy and brochure for relatives of patients dying in the ICU. *N Engl J Med* 2007;356:469-78.

**Appendix for web-only publication**

**A Proactive Communication Strategy for Family Members of Patients Dying in the ICU:  
A Multicenter Randomized Controlled Trial**

Alexandre Lautrette, Michael Darmon, Bruno Megarbane, Luc Marie Joly, Sylvie Chevret, Christophe Adrie, Didier Barnoud, Gérard Bleichner, Cédric Bruel, Gérald Choukroun, J. Randall Curtis, Fabienne Fieux, Richard Galliot, Maité Garrouste-Orgeas, Hugues Georges, Dany Goldgran-Toledano, Mercé Jourdain, Georges Loubert, Jean Reignier, Fayçal Saidi, Bertrand Souweine, François Vincent, Nancy Kentish Barnes, Frédéric Pochard, Benoit Schlemmer, Elie Azoulay

## **Patients and Methods**

This prospective randomized multicenter controlled trial was conducted in 22 ICUs in France, from May 2005 to October 2005. The study was approved by the institutional review board of the French Society for Critical Care in January 2005. In each ICU, a local investigator was responsible for the study and agreed to include the surrogate decision-maker of six consecutive patients who were expected to die within a few days. The surrogate decision-maker was either the surrogate designated by the patient or, when there was no surrogate, the person who ranked highest in the hierarchy for surrogate decision-making according to French law (spouse>parents/children>others) (1). Thus, in each family a single person was included.

The potentially eligible relative in each family was informed that a study on family needs was ongoing in several ICUs in France to compare two communication strategies (standard end-of-life communication and a new proactive communication strategy plus a leaflet) and that group assignment would occur at random. If the family member agreed to participate, he or she was asked to provide at least one telephone number for an interview 90 days after the death of the patient, aimed at assessing the emotional burden generated by the ICU experience.

The only inclusion criterion was that the physician in charge believed the patient would die within the next few days. Physicians were asked to identify eligible patients based on their own clinical judgment. This inclusion method was chosen to make the inclusion criterion generalizable to other critical-care settings. Exclusion criteria were patient age younger than 18 years and surrogate decision-maker having insufficient knowledge of French for a telephone interview. No interview was done if the patient was alive on day 90. Family members (one per patient) were allocated at random to the intervention or control group. As detailed below, in the control group the end-of-life conference occurred according to usual

practice in each center; whereas in the intervention group it was conducted according to specific guidelines and ended with a bereavement information leaflet being handed to the surrogate decision-maker.

### **Randomization procedure**

The study biostatistics department generated a randomization list stratified on the ICUs, using permutation blocks of six. Sealed consecutively numbered envelopes containing the name of the assigned group were sent to each ICU, with bereavement information leaflets. The leaflets were not in the sealed envelopes, so that the blind design was not broken. In each ICU, surrogate decision-makers who consented to the study were assigned a study number, and the investigator opened the envelope bearing that number to determine group assignment.

### **Description of routine family meetings occurring before end-of-life conferences**

The 22 ICUs that participated in the study were members of our research group FAMIREA (the study group aimed at improving communication with relatives in French ICUs), which has been working on family care in the ICU for 10 years. The intensivists in the FAMIREA have built up strong experience with studies of family care.(2-9) In all FAMIREA ICUs, practices are homogeneous regarding family care.

In FAMIREA ICUs, three early formal information meetings are held for all families. In our study, these three meetings occurred prior to randomization (that is, before the attending physician could determine that the patient would die) and were therefore identical in the two study groups. First, information is provided within 12 hours after ICU admission by the senior or junior physician on duty to provide general information on the diagnosis, prognosis, and treatments in the patient. This meeting is held with the relative or relatives who are present at ICU admission. A previously evaluated family information leaflet is given to the family at the end of this meeting.(2, 4) The second meeting is held within 48 hours after ICU admission, led by the senior intensivist in charge of the patient and attended by all family

members who want to and can attend. Nurses and junior physicians (residents) may participate in this meeting, which is intended to confirm the information provided at ICU admission, to provide additional information based on the course in the ICU, to answer the family's questions, and to check that the family understands the situation. The third meeting, which takes place between day 3 and day 5, is conducted by the senior intensivist in charge of the patient. All ICU staff members involved in care of the patient participate in this meeting. The patient's surrogate (or, when there is no surrogate, the person ranking highest for surrogate decision-making) attends the meeting, as well as other family members at the surrogate's request. The patient's history, acute disease, and treatments are detailed to the family, and the prognosis is explained. Questions by the family are answered by the intensivists and nurses.

For each patient, all meetings but the first are held by the same physician, who is the senior intensivist in charge of the patient. The first meeting is held by the intensivist on duty, who may or may not be the intensivist in charge of subsequently managing that patient. The primary care physician is not involved in these meetings but can attend them should the family so request; the family physician can provide additional information to family members in the ICU. In addition to these three formal meetings, information is provided to the family members by the nurses when they come to visit. On rare occasions, information is given to family members over the phone.

After these three meetings, if the patient is expected to die within the next few days, i.e., if a shift from curative care to palliative care (withdrawal or withholding of life support) is in order, an end-of-life conference is held, as described below. The intervention in our study consisted in changing the modalities of this end-of-life conference.

### **Description of routine end-of-life conferences in France**

In our study, the control group received end-of-life conferences as conducted routinely in each study center. In agreement with French legislation on end-of-life practices (1) and recommendations by the French Society for Critical Care, relatives of patients dying in the ICU are informed at least once a day of the patient's medical condition and of treatment-limitation decisions. An end-of-life conference is held to inform the family that death is imminent and to describe treatment-limitation decisions and their consequences; family members are free to share in decisions if they so wish, but treatment-limitation decisions in France are under the authority of the physicians and are made collegially by the ICU team.(6, 7) The end-of-life conference is not scheduled in advance but instead is held when the need becomes apparent, and when at least one relative happens to be in the ICU.

The nurses may or may not attend. The conference is led by the senior physician in charge of the patient. In some cases, but not always, the conference is held in a separate room. In earlier studies done by FAMIREA, mean end-of-life conference duration was 10 minutes.(2). In the current study, the investigator in each center attended all three usual-care (control) end-of-life conferences to ensure homogeneity in the conference format, completing a form on each conference. If the patient was still alive and in the ICU 3 days after the conference, a second conference was held according to usual practice.

## **Description of the proactive communication strategy tested in this study**

The intervention consisted in replacing the routine end-of-life conference described above by a conference conducted according to specific guidelines and ending with the delivery of a bereavement information leaflet. The intervention end-of-life conference was planned several hours in advance by the ICU staff members involved in caring for the patient. The participants included senior and junior physicians, nurses, a psychologist, other health professionals, and an unrestricted number of family members and friends; a social worker and a spiritual representative were invited to the conference if requested by the family. The conference always occurred in a quiet room where seats were available for everyone; beepers and cell phones were off.

In each ICU, the investigator was given specific guidelines for conducting family conferences. These guidelines were developed by the director of the research group at the University of Washington (JRC), who conducted extensive qualitative evaluations.(10-12) A detailed conference procedure was provided to each investigator.(10) During the conference, the investigator provided information on the diagnosis, prognosis, and treatment in the patient and discussed the appropriateness of treatment limitation with the family members. While conducting the conference, the intensivist sought to achieve five objectives described in the guidelines and summarized by the mnemonic VALUE:(10-12) Value and appreciate things family said, Acknowledge emotions, Listen, ask questions that allow you to Understand who the patient is as a person, and Elicit questions from the family.

To prepare for the study, the investigators attended a meeting about the study intervention. Each investigator was given a copy of the VALUE guidelines and of five published research articles reporting the description and evaluation of family conferences.(10-14) Subsequently, one of us (AL) traveled to each center to discuss the VALUE guidelines with the investigator and to check that the difference between the intervention end-of-life

conference and the usual-practice (control) end-of-life conference was clearly understood. In each center, the investigator then worked with the other intensivists to explain the VALUE guidelines. Nurses were not made aware of the guidelines. The investigator attended all three intervention end-of-life conferences, to ensure homogeneity of the conference format, completing a form on each conference. If the patient was still alive and in the ICU 3 days after the conference a second conference was held.

At the end of the intervention end-of-life conference, the family member who was included in the study was handed a bereavement information leaflet, whose content was explained orally. The 15-page leaflet describes and explains end-of-life care, possible reactions after the death of a family member, how to communicate with other family members or children, and where to find assistance. This leaflet has been used for several years in pediatric ICUs in France.<sup>(15)</sup> For the current study, the leaflet was modified in two ways: it was adapted for adult ICUs, and the explanations were provided in a way that emphasized the seven points previously suggested to optimize end-of-life care.<sup>(14)</sup> To prepare for the study, the investigators read the leaflet and made suggestions about improving it. The final leaflet was then printed.

### **Telephone interview 90 days after the patient's death**

One family member per patient was interviewed over the telephone 90 days after the patient's death, between August 2005 and January 2006. All phone calls were made by the same person (AL), who was not an investigator in any of the participating ICUs and who was blinded to group assignment. The first phone call was made exactly 90 days after the patient's death. Family members who did not answer the first call were called again, two to three times a day. After 15 unsuccessful attempts, the family member was considered lost to follow-up. The interviewer was trained by the sociologist of our research group (NKB), who has extensive experience with interviewing family members of ICU patients.<sup>(7)</sup> After introducing

himself, the interviewer reminded the family member of the study design and that the interview would last 15 to 30 minutes. Our primary outcome measure was the Impact of Event Scale (IES) score, which assesses symptoms related to posttraumatic stress disorder (PTSD).(7, 16-18) Our secondary outcome measures were symptoms of anxiety and depression as assessed using the Hospital Anxiety and Depression Scale (HADS).(9, 19) French versions of both the IES and the HADS have been validated in family members of critically ill patients.(7, 9) The IES has been widely used for many years(18) and found reliable for many traumatic events, including bereavement.(17) It can be easily completed during a telephone interview.(7, 20) Each of the 15 IES items is scored from 0 to 5, so that the total score can range from 0 to 75, with higher scores indicating greater severity of PTSD-related symptoms.(21, 22) We classified patients as having low or high IES scores using 30 as the cutoff, in agreement with previous reports.(7, 18) The HADS consists of two subscales that evaluate symptoms of anxiety (7 items) and symptoms of depression (7 items). Subscale scores range from 0 (no distress) to 21 (maximum distress). A score above 8 on the two subscales was taken to indicate significant symptoms of anxiety or depression.(9)

### **Data collection**

Investigators recorded ICU and patient characteristics (Tables 1 through 3) on standardized forms. Continuing life-sustaining treatments after a decision has been made to withhold or withdraw other life-sustaining treatments in patients who ultimately die in the hospital indicates failure to achieve a fundamental goal of medicine and provides no benefit to patients; therefore we defined "nonbeneficial treatments" as non-palliative treatments used after a decision to forgo life support.(23, 24) ICU patients with decisions to forgo life support are not transferred to wards in France. Assessment of family participation in the end-of-life decision-making process was recorded as previously reported.(6, 7) A specific form was used to collect data describing the end-of-life family conference. Investigators were also asked to

clock family conference times. Data in table 4 were collected by the interviewer 90 days after the patient's death.

### **Statistical analysis**

Because PTSD-related symptoms are common in family members of ICU patients, particularly those of patients who die in the ICU, we selected the IES score as our primary outcome measure.<sup>(7)</sup> Based on data from our previous study,<sup>(7)</sup> we hypothesized that the proactive communication strategy (end-of-life family conference and bereavement information leaflet) would decrease the risk of PTSD-related symptoms by 30% compared to usual practice. To detect a significant difference between the two groups with a type I error of 0.05 and a power of 0.90, 100 families had to be recruited, 50 in each group. We included 132 family members (66 in each group) to allow for families lost to follow-up on day 90 (up to 25%).<sup>(7)</sup> Symptoms of anxiety and depression as measured by the HADS were secondary outcome measures. Continuous variables were reported as medians and interquartile ranges (IQR), and categorical variables as proportions. Comparisons of continuous variables between the two randomized groups were performed using the Wilcoxon rank-sum test, whereas comparisons of categorical variables were with the Pearson chi-square test, or the Fisher's exact test where appropriate. All tests were two-sided, and *P* values less than 0.05 were considered statistically significant. Statistical tests were performed using the SAS software package (SAS 9.1 Institute, Cary Inc. CA).

## References for the Web Supplement

1. Lemaire FJ. A law for end of life care in France? *Intensive Care Med* 2004;30:2120 Epub 004 Sep 21.
2. Azoulay E, Chevret S, Leleu G, et al. Half the families of intensive care unit patients experience inadequate communication with physicians. *Crit Care Med* 2000;28:3044-9.
3. Azoulay E, Pochard F, Chevret S, et al. Meeting the needs of intensive care unit patient families: a multicenter study. *Am J Respir Crit Care Med* 2001;163:135-9.
4. Azoulay E, Pochard F, Chevret S, et al. Impact of a Family Information Leaflet on Effectiveness of Information Provided to Family Members of Intensive Care Unit Patients. A multicenter, prospective, randomized, controlled trial. *Am J Respir Crit Care Med* 2002;165:438-42.
5. Azoulay E, Pochard F, Chevret S, et al. Family participation in care to the critically ill: opinions of families and staff. *Intensive Care Med* 2003;29:1498-504 Epub 2003 Jul 10.
6. Azoulay E, Pochard F, Chevret S, et al. Half the family members of intensive care unit patients do not want to share in the decision-making process: a study in 78 French intensive care units. *Crit Care Med* 2004;32:1832-8.
7. Azoulay E, Pochard F, Kentish-Barnes N, et al. Risk of post-traumatic stress symptoms in family members of intensive care unit patients. *Am J Respir Crit Care Med* 2005;171:987-94 Epub 2005 Jan 21.
8. Moreau D, Goldgran-Toledano D, Alberti C, et al. Junior versus senior physicians for informing families of intensive care unit patients. *Am J Respir Crit Care Med* 2004;169:512-7 Epub 2003 Dec 4.
9. Pochard F, Azoulay E, Chevret S, et al. Symptoms of anxiety and depression in family members of intensive care unit patients: ethical hypothesis regarding decision-making capacity. *Crit Care Med* 2001;29:1893-7.
10. Curtis JR, Patrick DL, Shannon SE, Treece PD, Engelberg RA, Rubenfeld GD. The family conference as a focus to improve communication about end-of-life care in the intensive care unit: opportunities for improvement. *Crit Care Med* 2001;29:N26-33.
11. Curtis JR, Engelberg RA, Wenrich MD, Shannon SE, Treece PD, Rubenfeld GD. Missed Opportunities during Family Conferences about End-of-Life Care in the Intensive Care Unit. *Am J Respir Crit Care Med* 2005;171:844-9 Epub 2005 Jan 7.
12. McDonagh JR, Elliott TB, Engelberg RA, et al. Family satisfaction with family conferences about end-of-life care in the intensive care unit: increased proportion of family speech is associated with increased satisfaction. *Crit Care Med* 2004;32:1484-8.
13. Curtis JR, Engelberg RA, Wenrich MD, et al. Studying communication about end-of-life care during the ICU family conference: development of a framework. *J Crit Care* 2002;17:147-60.
14. Clarke EB, Curtis JR, Luce JM, et al. Quality indicators for end-of-life care in the intensive care unit. *Crit Care Med* 2003;31:2255-62.
15. Leverger G, Auvrignon A, Nomdedeu S, Hubert P. [Needs' assessment and resources for pediatric palliative care.]. *Arch Pediatr* 2006;9:9.
16. Yehuda R. Post-traumatic stress disorder. *N Engl J Med* 2002;346:108-14.
17. Zisook S, Chentsova-Dutton Y, Shuchter SR. PTSD following bereavement. *Ann Clin Psychiatry* 1998;10:157-63.
18. Sundin EC, Horowitz MJ. Horowitz's Impact of Event Scale evaluation of 20 years of use. *Psychosom Med* 2003;65:870-6.
19. Zigmond AS, Snaith RP. The hospital anxiety and depression scale. *Acta Psychiatr Scand* 1983;67:361-70.

20. Jones C, Skirrow P, Griffiths RD, et al. Post-traumatic stress disorder-related symptoms in relatives of patients following intensive care. *Intensive Care Med* 2004;30:456-60. Epub 2004 Feb 4.
21. Brady K, Pearlstein T, Asnis GM, et al. Efficacy and safety of sertraline treatment of posttraumatic stress disorder: a randomized controlled trial. *Jama* 2000;283:1837-44.
22. Joseph S. Psychometric evaluation of Horowitz's Impact of Event Scale: a review. *J Trauma Stress* 2000;13:101-13.
23. Schneiderman LJ, Gilmer T, Teetzel HD. Impact of ethics consultations in the intensive care setting: a randomized, controlled trial. *Crit Care Med* 2000;28:3920-4.
24. Schneiderman LJ, Gilmer T, Teetzel HD, et al. Effect of ethics consultations on nonbeneficial life-sustaining treatments in the intensive care setting: a randomized controlled trial. *JAMA* 2003;290:1166-72.

**Figure 1 of the supplemental appendix**

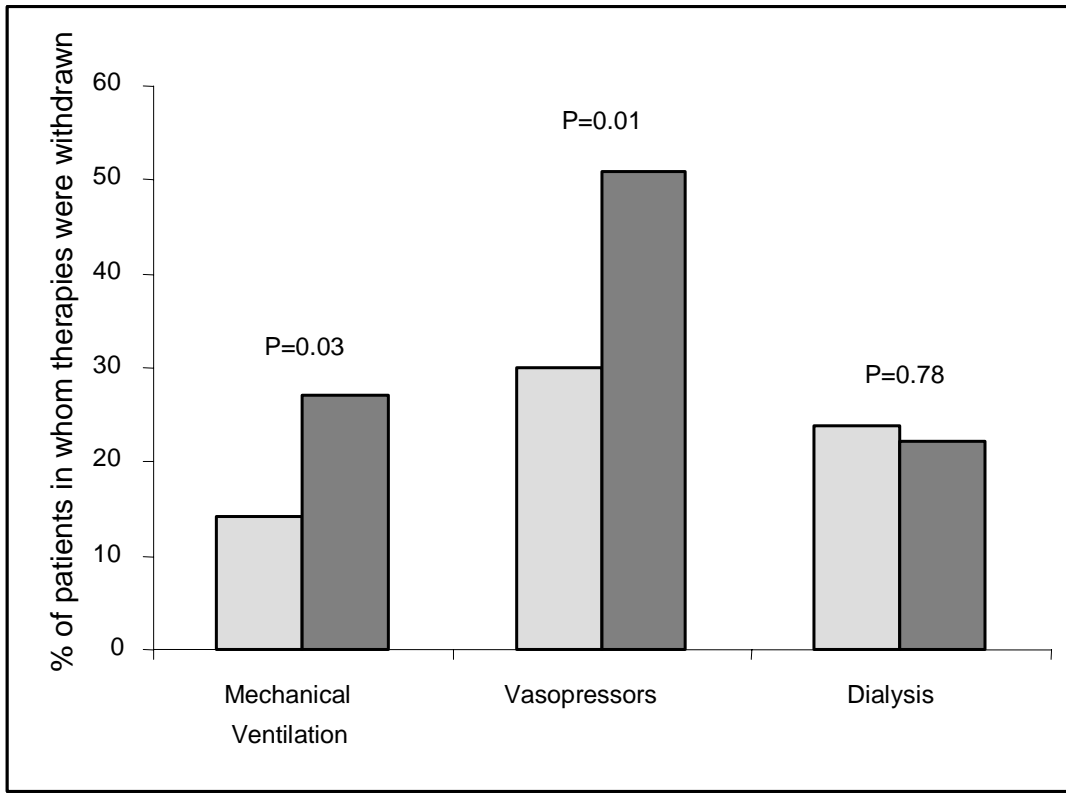

**Figure 1 - Supplemental Appendix**

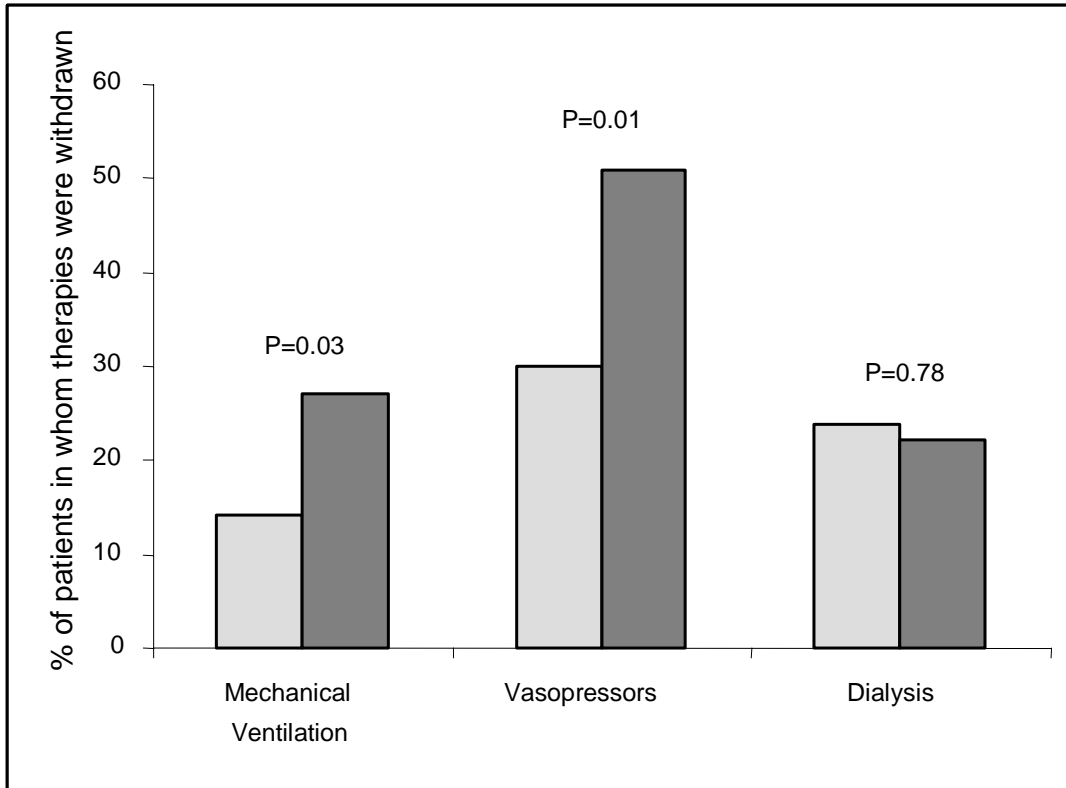

# Bereavement Support Leaflet

**Medical Intensive Care Unit, Saint-Louis Teaching Hospital**  
**ORGANIZATION CHART**

Head of the unit :

Assistant head:

Full-time hospital physicians :

Clinical fellows:

Head nurse:

Secretary:

Social worker:

Members of the clergy: for each religion

Volunteers:

You have come to see a loved one in the intensive care unit. The doctor has just told you that none of the treatments can prevent your loved one from dying.

This leaflet was written for you. We hope that it will help us support you as you work through this personal tragedy.

Most people say that losing a loved one is the worst ordeal they have ever experienced. Although this leaflet cannot lessen your pain, we hope it will help you understand your feelings. Family members of patients who have died in the intensive care unit have told us that understanding their feelings helped them to cope.

This leaflet supplies practical information about things you will need to do in the next few days for yourself and your family. It also discusses the feelings you or your family may experience over time in response to your loss.

Please read it as often as you need to, according to the way your feelings change over time. Give it to your family members so that they can read it also. Some of the sections will be useful now and others later on. If you cannot read it now, keep it and read it later.

This leaflet is not intended as a substitute for a personal caring relationship between you and us. On the opposite, it is an invitation to develop with us the kind of relationship that will help you.

We will gladly meet with you and answer your questions. Please feel free to ask to see us, now or later on, whenever you feel the need.

We care deeply about your sorrow.

## **Who can you ask?**

We are available for answering any questions you may have. Please feel free to ask us.

- Regular meetings with the doctor will help you understand how your loved one's situation is evolving.
- The nurses and head nurses can provide you with guidance about administrative procedures, such as registering the death and contacting a funeral home.
- A social worker can meet with you to help work out solutions to financial or social problems.
- A psychologist will meet with you at your request.
- A member of the clergy can be contacted at your request.
- If you have a family doctor that has not yet been in contact with us, feel free to ask your doctor to call us.

*The first section of this leaflet explains the care your loved one will receive now in our unit. We hope this information will help you understand what the doctors and nurses are doing for your loved one and how the unit works. We are extremely attentive to detecting pain and any other symptoms your loved one may experience, and we are doing everything we can to keep your loved one comfortable, free of pain and distress.*

## **Organization of care for patients at the end of life in the intensive care unit**

- The nurses provide care to your loved one continuously. There is always a doctor in the unit, 24 hours a day and 7 days a week. The doctor and nurses take the necessary steps to make sure your loved one remains free of pain, distress, or suffering.
- The hospital has a Family Home with rooms for family members who live far away. If you would like to know whether rooms are available, please ask us to call the Family Home.
- In our unit, care at the end of life is planned by the ICU team according to each patient's needs and is delivered in the same way during the day and at night. You may have special requests, for instance about being notified if your loved one dies, about calling a member of the clergy, or about allowing a family member coming from far away to enter the room outside visiting hours. Please let us know: we will write your requests in the unit log, which will ensure that they are honored at all times.
- The nurses and doctors deliver care to the patients regularly. Each doctor and each nurse is responsible for several patients. In our unit, you are free to visit at any time during the day or at night. However, during some patient care routines you may be asked to go to the waiting room, in order to protect the confidentiality, privacy, and dignity of your loved one. We will do our utmost to let you spend as much time with your loved one as possible. You may want to participate in some of the aspects of your loved one's care, such as washing, massaging, or feeding: if so, please let us know.
- You have met with the doctor in charge of the medical care to your loved one. Feel free to ask for another meeting if you wish to have additional information. The terms used by intensive care doctors may be difficult to understand. Please ask them to explain if needed. The nurses can also give explanations. There is a glossary in this leaflet.
- Your usual family doctor can ask for explanations and review the medical records of your loved one. It is important to share information with people who can help you to understand.

## **Glossary to help you understand the care given to your loved one**

**Sedation:** Sedation is the use of relaxing medicines to induce a deep sleep. Sedation prevents **pain** and agitation and lets the patient be more comfortable with the breathing machine.

**Catheter:** A catheter is a slender tube made of soft plastic that is inserted into a large vein at the neck or leg. Analgesics, other medicines, fluids, and nutrients (liquid food) can be given rapidly and efficiently through the catheter.

**Gastric tube:** A gastric tube is a soft plastic tube that is inserted into the stomach and used to remove secretions or to give food.

**Hydration:** Hydration is the administration of fluids, sugar, and salt to cover the patient's needs, so that dehydration does not occur.

**Pain management:** Pain can be physical or psychological. We treat physical pain by giving powerful analgesics. For psychological pain, which is a mixture of anxiety and depression, we use effective anti-anxiety medications. In both cases, the medications are administered through a catheter into the bloodstream.

**End-of-life care:** When a patient is admitted, our goal is to provide care that will allow the patient to get better. However, when none of the treatments that exist today is capable of achieving this objective, our goal is to accompany the patient through the final stages of life, in order to avoid suffering and to make sure that the patient is free of physical pain and psychological distress at all times.

**Palliative care (Comfort care):** Palliative care differs from curative care (which seeks to achieve recovery). Palliative care is designed to provide comfort and repose, psychological well-being, and freedom from pain.

**Appropriate level of care:** For each patient in the ICU, we continuously evaluate the plan of care to determine the benefits and possible drawbacks of each component of the plan. We determine the appropriate level of care based on these benefits and drawbacks. We stop components of the plan of care that are not working and that cause suffering.

**Listening/Giving information:** Every day, the nurses and doctors will listen to you and inform you about your loved one's condition. Feel free to make appointments with the doctor. You should feel that you have all the information you need and that you have said what you wanted to say, on your own behalf or on behalf of the patient. You can make an appointment with the head of the ICU.

## **After the death of your loved one...**

**The rest of this leaflet will help you prepare as best as possible for your loss. Some pages will be useful to you, and others will be less helpful.**

### *After the death of your loved one*

We suggest that you spend time with the body in quiet remembrance, in the ICU room then in the hospital mortuary room. Family members may not be ready or willing to see the body at the same time. Feel free to talk to us about this.

The nurse and nursing assistant who cared for your loved one will prepare the body. Some family members have very personal wishes, such as holding the body in their arms, helping to prepare and dress the body, or reading a passage out loud. We will do our best to help you realize your wishes.

A member of the clergy can be called at your request.

*Paperwork*

The hospital will notify the registrar's office at the Town Hall (.....*adequate address for each center*.....) within 24 hours of the death.

You will need to contact a funeral home to make arrangements (burial, cremation, or shipment of the body to another country). The funeral home can take care of obtaining the death certificate from the town hall; you will need to lend the appropriate ID documents for this purpose.

Information on the required paperwork is available at the hospital's vital records office. If you are unable and unwilling to visit the vital records office, a member of your family can go instead.

*What will happen to the body?*

You will decide about funeral arrangements and what will happen to the body.

At the hospital, the body will be taken from the ICU to the mortuary room. By law, the body can stay in the ICU no longer than 10 hours. You will decide whether the body is taken from the mortuary room to the place of burial, to your home or your loved one's home, or to a funeral home.

It is very important that you give enough thought to the funeral arrangements. You need time to decide what you want regarding the burial or cremation.

The mortuary room attendants will place the body in a casket. The funeral home arranges the transportation of the body and the burial or cremation. The family must pay for the cost of the funeral. The social worker at the hospital can inform you about the financial help that is available for families with limited financial resources.

If you decide to have the body cremated, you will need to decide where you want the urn containing the ashes to be placed (for instance, in the ground, in a tomb, or in a columbarium). Experience has shown that keeping the urn at home is not a good choice, for you or your family. It is probably best to choose a specific place for the urn where you will be able to go and reflect about your loved one. You may also decide to have the ashes scattered either at a scattering garden or in an outdoor setting of your choosing.

*The mortuary room*

The mortuary room is a department in the hospital where the bodies of deceased patients are harbored to give families the time they need to make funeral arrangements.

You and your family can visit the mortuary room to reflect near your loved one's body as often as you want to. Ask about mortuary-room opening hours.

The mortuary room staff is available to meet your needs and to help you through the steps that lead to the funeral. Feel free to ask them for advice. They will answer your questions and requests.

You can give them clothes to dress the body in and you can help to prepare the body.

At your request, the mortuary room staff will give you a list of funeral homes. The mortuary room is designed so that all religious and cultural customs can be honored. Contact information for members of the clergy is available at the mortuary room.

*Funeral rites*

Funeral rites are extremely important to help you honor your loved one as you take the body to its final resting place. The rites fulfill a need, and experience shows that they provide comfort. You will probably choose the rites for your loved one's funeral according to your religious beliefs, your culture, and your family traditions.

You will need to make the arrangements for the funeral, together with the funeral home and members of the clergy if you so wish.

The funeral ceremony, which may or may not be religious in nature, is designed for you and your family. It can help to symbolize your loss, which you share with the other family members and friends. You will cherish the memories of the ceremony all your life. These memories will be important in helping you work through your grief.

If you have no religious beliefs, you can choose non-religious rites, which will serve the same purpose as religious rites. Give yourself enough time to explore all the options.

*The autopsy*

The doctor may already have explained how important it is, in some specific cases, to perform an autopsy in order to clarify the cause of death. By law, consent to the autopsy must be obtained from the family. If you refuse, no autopsy will be performed, except by judicial decision in specific situations.

The autopsy is performed at the hospital. An autopsy is a medical procedure that is performed by specialized doctors, in a way that respects your loved one's body.

The hospital doctor or your usual family doctor will give you a copy of the autopsy report and will discuss the results with you.

Remember that several months may be needed to obtain some of the autopsy results.

*The next pages were written based on the accounts of families who lost a loved one. They told us that receiving at least partial explanations about the grieving process helped them work through the pain of their loss. Grieving is a complex and exhausting process, but by working through it you will eventually recover. Please let us know about any special requests you may have, about your feelings and about how you believe we can support you.*

## **Landmarks on your journey through grief**

### *The moment of death*

Even when there has been plenty of time to prepare, the moment of death comes as a shock that is felt almost more as a physical jolt than as an emotional experience, a sort of violent inner rent.

Your loved one is dead and you are there, unable to understand what happened to you. People have told us they felt numb, stunned, in a state of deep emotional shock that prevented them from reacting. You may experience regrets and guilt: please share these natural but painful feelings with us or your usual doctor. Guilt about the death of a loved one is common and can be lessened by explanations about the exact causes and circumstances of the death.

The death of a loved one is a major life crisis that turns our world upside-down. Time seems to stand still.

*The funeral*

The funeral is a time of strong emotions. It may seem unbearably painful because it signifies permanent loss. However, the funeral is also a time for saying good-bye and for finding comfort in sharing your sorrow with others.

Give enough thought to what is important to you and to what you want for your loved one's funeral, in accordance with your beliefs and wishes. The funeral will allow you to share your pain with those who are close to you and who join you in bidding a final farewell to your loved one. You may want to make a speech or to ask other family members or friends to make one.

Do, or have others do, what your feelings tell you should be done. You may want to obtain help from those who are close to you: share your thoughts with them.

Remember that it is never too late to honor the memory of your loved one. If you were not able to at the moment of death, you can choose another time that works for you.

*Working through the grieving process*

The grieving process is an intensely personal journey during which you will work through inner upheavals and painful feelings. At some of the stages in this long journey you will experience terrible suffering, while at others you will feel relief.

Grief is a succession of feelings and overlapping stages that vary according to personal and cultural factors. You will need time and an enormous amount of energy to go through the grieving process.

Along your journey, sharing your feelings with other people is very important. You must find people you can talk to. However, you will also need to protect yourself. Some people will be of help, but others will not. Close family ties do not always translate into effective support.

**As you move forward on your journey, you will experience many feelings, doubts, uncertainties, and spells of anger ...**

### **Helplessness**

You may experience a sense of emptiness, of being drained. You may feel you are going through the motions of everyday life like a robot and that you are only hanging on out of habit.

### **Denial**

Sometimes, a member of the family tries to deny the tragedy. This person may behave as though your loved one were still alive. This sense of disbelief is usually a brief phase that provides a reprieve before confronting the terrible loss. Some people are surprised by this reaction of disbelief, which may be a barrier to communication with family and friends.

### **Physical symptoms**

Your physical and emotional pain may settle in your body. Your entire body may be painful. You may experience a vague feeling of ill-being, difficulty sleeping, stomach pain, headaches, loss of appetite, or other symptoms. Your whole body may reflect your suffering. You may feel that your thoughts and movements are slowed down, as your energy is turned inward. All your thoughts are for your loved one. Or perhaps on the contrary you will feel a need to be extremely active in all the areas of your life. There is no reason to feel ashamed or afraid of these feelings.

## **Anger and rebellion**

Feelings and questions may force themselves on you: you may want to protest at the unfairness of your loss or to find someone to blame, for instance. Incomprehension may lead to a search for meaning, for explanations. You may ask yourself and others: "Why?", over and over again ...

## **Guilt**

As you strive to understand what happened, you may experience feelings of guilt related to things you did or did not do. Many people believe that feelings of guilt contribute much of the suffering, last longest, and are particularly complex. Talk about your feelings of guilt to those who are close to you and to us here in the intensive care unit.

## **The suffering woven into everyday life**

Everyday life is full of small events that will rekindle your suffering and remind you that your loved one is gone. Being in places that are permeated with memories of your loved one, seeing a happy family, attending family reunions: all these events may reawaken your suffering.

It is important to share your pain with those who are close to you, your family, your friends. Allow yourself to cry and let people take care of you. You may feel your behavior is babyish: that's OK.

Acknowledge that sharing memories just doesn't work with some people. People may be clumsy and their words may hurt you.

Little by little, set yourself day-to-day goals (prepare a meal, run an errand, read a newspaper article ...)

**Loneliness and despair**

Intense inner suffering may lead to feelings of despair and depression. You may feel that you don't care about anything anymore. Getting through each day may seem unbearably burdensome. You may feel that you are losing your mind or that you want to die. All these feelings attest to the intensity of your pain and distress. Sharing them with other people is extremely important. However, it may be difficult to talk about your pain with people you know. You may find it useful to talk with a counselor, a psychologist, or a psychiatrist.

### *Coping with the absence of your loved one*

Learning to live without your loved one is a long and difficult task. Give yourself enough time and be forgiving toward yourself and toward others, as you will make progress at times but also seem to lose ground at other times. There will be hurdles to clear and turning points to negotiate.

Grieving is not the same as forgetting. Grieving means accepting that life has changed forever and that you can be happy and fulfilled while carrying the scar left by the loss of your loved one. The relationship you had with your loved one must change in order to incorporate your loss.

*Your relationship with your partner*

Bereavement can strain your relationship with your partner. The strong emotions that may arise because of your loss may seem to pull you together or push you apart. You and your partner will not necessarily experience the same emotions at the same time. Sometimes, this difference helps. At other times, the differences in your emotions may seem to harm your relationship by making it more difficult to share your feelings with each other.

For many men, sharing feelings of pain is difficult or even impossible. In our society, men rarely allow themselves to express their suffering. Accepting to talk about your feelings is important, and your partner may be able to help you.

However, remember that you are both different and that each of you must make his or her own journey through the grieving process.

*Telling the children*

Children need to know the truth, told simply, with words that are easy to understand. It is best to tell them about the death rather than to wait until they understand on their own. Many children neither cry nor even seem to pay much attention. Getting back to what they were doing before your conversation may appear to be their main concern. Nevertheless, your words do get through to them.

Let them know it is OK to talk about it and to share their feelings when they are ready to. Children also must work through their grief. Their suffering may show in many ways, for instance as sadness, anxiety, anger, loss of appetite, difficulty sleeping, aggressiveness, withdrawal, and also denial or apparent indifference...

Children's conception of death varies with their developmental stage, and therefore they handle grief differently according to their age. You can state clearly that everyone dies. Do not compare death to sleep or to a long trip, as the child may then develop a fear of falling asleep or traveling. You might want to say that when people die they do not move, breathe, or feel any more.

Reassure your children that death is not a punishment or an act of retaliation and that they are not responsible for the death, although they may feel guilty.

A huge amount of effort will be needed on your part to be your usual self for your children, and at first you may feel that you are not behaving naturally. Remember, your efforts to keep yourself together and to appear upbeat when your children are there is your first step toward embracing life again.

*Telling your family and friends*

Some of your family members and friends may feel uncomfortable about your personal tragedy. They may choose not to talk about it, instead acting as if nothing has changed or as if they no longer dare to broach the subject. You may be deeply hurt by this response.

Protect yourself. Talk about your loss only with people you feel are capable of listening to you. You will need to give hints to your family and friends. You want to talk about your loved one and to discuss memories about good times spent together? Let them know! You don't want to talk about the past, you prefer to think of other things, to make new plans, to look toward the future? Again, let them know! They cannot guess your feelings ...

## **Your loved one is dead. How can you go on living?**

- Allow yourself to feel pain, to show your sadness, and to cry. You are not weak, and neither are you abnormal. You are grieving.
- Accept to do less than usual. Grieving requires a huge amount of energy, and you often feel tired. Exhaustion is normal.
- See other people: withdrawing does not help. Let your family and friends know whether you want to talk about your loved one or instead turn your thoughts toward other things ....
- Take care of yourself. If you do not usually pay attention to your own needs or take care of your body, now is the time to develop self-care routines: they are indispensable to people who are grieving.
- Learn to identify the people and activities that are good for you. Spend time with the people and schedule the activities.

- Set goals that are simple and within easy reach. Setting the bar too high is unhelpful. Realistic goals may be to prepare a real dinner, to walk down to the park, or to swim for an hour. Deciding that you "must get over it" is not realistic. Each small victory over sadness is a step toward enjoying life again.

- If you feel guilty about the death of your loved one, talk about it. Otherwise, you may get stuck in your feelings of guilt, which will stop you from getting back to enjoying life again. You are a human being, and no one is perfect. If you acknowledge this, you will be able to see your guilt merely as a sign that you must accept yourself as a human being.

- At times, you may be unwilling to talk about your loved one, and you may want to go to a place where no one knows what happened to you. These wishes are normal. You may at times experience a fleeting sense of happiness. Don't feel guilty. You can be happy again without betraying your loved one.

- Your family and friends may give you a plentiful supply of advice, in an effort to support you. Some pieces of advice will help but others will not. Remember, you are the only person who knows what is best for you. There is no reason to let others tell you what to do.

- Wait a while before making life-changing decisions such as changing jobs, moving, divorcing, or relocating abroad. Acknowledge that now is not the time to make decisions you might regret later on.
  
- Some people find that the grieving process is harder than they thought or that they are not getting enough support. If such is the case for you, professionals can help you.
  
- Ask your usual doctor to help. Your doctor will decide whether you need medications (antidepressants or sleeping pills).
  
- Feel free to see a psychiatrist, a psychologist, or a counselor. You are not crazy or inept. A need for professional help is normal in people who have lost a loved one. Because they are not personally involved in your loss, professionals are in a good position to help you.

## **Where can you find help?**

- Here, in the ICU, from the doctors, head nurses, nurses, psychiatrist, psychologist ...

You can ask for help now or later on, according to your needs.

- At bereavement organizations.

Feel free to obtain information from one or more bereavement organizations. An exhaustive list of bereavement organizations can be found in the book: *Vivre le deuil* (Living through Grief) by Emmanuel Moreau, Ed. Jacob Duvernet / guide France Info, 2001.

## Further reading

Here are a few books that may help you in your personal journey.

*Aimer, perdre, grandir, assumer les difficultés et les deuils de la vie*

*Loving, losing, growing up, coping with the challenges and grief that are part of life*

Jean Monbourquette, Bayard / Centurion, 1995

This book is designed to serve as a companion. It is not a treatise or an essay. It is a guide that focuses on the emotions.

*Le deuil. Comment y faire face? Comment le surmonter?*

*Bereavement. How to cope? How to get on?*

Nadine Beauthéac, Seuil, 2001

The concrete ideas and information supplied in this book will help you understand the importance of journeying through this period of bereavement according to your own specific wishes.

*Quand le deuil survient. 80 questions et réponses.*

*When bereavement happens. 80 questions and answers.*

Roger Régnier et Line Saint-Pierre, Sciences et culture, Montréal, 2000

In this book, the authors answer frequently asked questions, in order to provide information, support, and comfort to bereaved people.

*Vivre le deuil au jour le jour : réapprendre à vivre après la mort d'un proche*

*Living through bereavement from day to day: learning to live again after losing a loved one*

Dr Christophe Faure, J'ai lu, 2001

This book helps to understand bereavement and the feelings it generates, and it also helps to provide support to people who suffer. This is a psychological guide for bereaved people and for those who are close to them.

*Parler de la mort*

*Let's talk about death*

Françoise Dolto, Mercure de France, 1998

This is a conference that discusses talking about death with people who are dying, who no longer want to live, or who have lost a loved one. It also discusses talking to children about death.

## Glossary

### *Burial, interment, inhumation*

The practice of placing the body of the deceased person in the ground.

### *Casket*

A special receptacle in which the body is placed for burial (or sometimes for cremation).

### *Columbarium*

A place in a cemetery designed to harbor urns that hold cremated remains.

### *Cremation, incineration*

The practice of burning the body of the deceased person. The ashes are then placed in an urn.

### *Departure ceremony*

Moment when the family gathers one last time around the body of the deceased. The body is then placed in a casket and taken from the hospital or home.

### *Funeral, funeral service*

Ceremonies held in connection with a burial or cremation.

### *Funeral rites*

Set of practices that have a religious or symbolic character and that help people say their final farewell to a deceased loved one.

### *Garden of Memories*

Flowered lawn in a cemetery where the ashes of the deceased person may be scattered, if such was the deceased person's wish.

### *Memorial ceremony*

Ceremony designed to remember a person or an event.

### *Morgue, mortuary, mortuary room, funeral home*

Place in a hospital or specialized establishment that is specifically designed to harbor the body of a deceased person and to allow viewing or visitation by family and friends before the funeral.

*Place of burial*

The final resting place of the body after interment, that is, the ground or burial vault.

*Sepulture*

The act of placing the body of the deceased person in the ground or in a burial vault, with the attendant formalities and ceremonies.

*Preparing the body*

Cleaning and clothing the body in the mortuary room before the departure ceremony.

*Viewing, visitation*

A time during which family and friends pay their respects to the deceased person by visiting the body, which may be in an open or closed casket, in a special room at the hospital or funeral home.

# Livret d'accompagnement des familles

**Service de Réanimation Médicale, Hôpital Saint-Louis**  
**ORGANIGRAMME DU SERVICE**

Chef de Service :

Adjoint :

PH :

*Chefs de Clinique-Assistants :*

*Cadre supérieur infirmier :*

*Cadre de soin :*

*Secrétaires médicales :*

*Secrétaire Hospitalière :*

*Assistant social*

*Ministre du culte : pour chaque religion*

*Bénévoles :*

Un membre de votre famille ou un de vos amis est hospitalisé en Réanimation. L'équipe médicale vient de vous annoncer le décès attendu de votre proche.

Ce livret d'accueil a été conçu pour vous. Il a pour but de vous aider à comprendre l'environnement dans lequel votre proche est soigné et de vous aider à traverser cette terrible épreuve.

La plupart des personnes témoignent que la mort d'un proche est l'expérience la plus difficile qu'elle ait eu à vivre. Par ce livret, nous n'avons pas la prétention de soulager votre peine ; toutefois l'expérience des familles de patients nous a appris que le fait de comprendre ce qui se passe en vous peut vous aider.

Ce livret apporte des informations et des conseils sur les initiatives bien concrètes que vous aurez à prendre dans les prochains jours pour vous et les vôtres. Vous y trouverez également des informations sur vos réactions possibles face au deuil ou sur celles de votre entourage.

Lisez-le et relisez-le en fonction de vos besoins, des étapes que vous traversez. Faites le lire à votre entourage. Certains chapitres vous seront utiles dès à présent, d'autres ultérieurement. Si vous ne pouvez pas le lire maintenant, gardez-le pour plus tard.

Ce livret ne se substitue pas au lien humain établi entre vous et notre équipe. Il est au contraire une invitation à rechercher et à créer des liens capables de vous aider.

Nous sommes à votre disposition pour vous rencontrer, répondre à vos questions. N'hésitez pas à nous solliciter, maintenant ou plus tard, lorsque vous en ressentirez le besoin.

L'ensemble de notre équipe s'associe à votre profonde tristesse.

## **A qui vous adresser ?**

Pour toutes vos requêtes ou interrogations, n'hésitez pas à solliciter une personne de notre équipe.

- un entretien avec le médecin vous permettra de faire régulièrement le point sur l'état de santé de votre proche,
- les cadres infirmiers, les infirmières pourront vous guider dans les différentes démarches que vous avez à accomplir,
- une assistance sociale peut vous recevoir pour vous aider à trouver une solution à des problèmes financiers ou sociaux,
- vous pouvez également demander à rencontrer le psychologue,
- un représentant du culte peut être contacté à votre demande.
- Si vous avez un médecin de famille avec lequel nous ne sommes pas encore en contact, n'hésitez pas à lui demander de nous appeler.

*Le début de ce livret a pour objectif de vous expliquer les soins de fin de vie que reçoit votre proche dans le service de Réanimation.*

*Il vous permettra de mieux comprendre les actes effectués par l'équipe soignante et l'environnement dans lequel se trouve votre proche. Il vous apportera aussi l'assurance que nous privilégions avant tout le confort de votre proche et que nous sommes très attentif à la douleur et aux autres symptômes qui pourraient être présents.*

## **Comment s'organisent les soins donnés à un patient en fin de vie en Réanimation ?**

- Les infirmier(e)s prennent soins et surveillent votre proche en permanence, au moins un médecin est présent dans le service 24 h/24. Ils veillent tous à ce que votre proche ne ressente pas de douleur, de détresse ou de souffrance.
- Si vous habitez loin, un hébergement peut être possible à la maison des parents en fonction des places disponibles.
- Les décisions prises par l'ensemble de l'équipe de réanimation sont appliquées de façon identique le jour ou la nuit. Si vous avez exprimé des souhaits (que l'on vous prévienne ou pas, que l'on appelle un représentant religieux, que l'on laisse entrer un membre de la famille venu de loin en dehors des horaires de visite...), ceux-ci sont consignés dans les cahiers de transmission et seront respectés.
- L'équipe soignante effectue des soins réguliers aux patients. Chaque médecin et infirmier (ère) a en charge plusieurs malades. Dans notre service, les horaires de visites ne sont pas limités, toutefois afin d'effectuer les soins dans le respect de la confidentialité, la dignité et la pudeur, nous serons amenés à vous faire patienter dans la salle d'attente. Néanmoins, nous faisons le maximum pour que vous puissiez passer le maximum de temps auprès de votre proche. Si votre souhait est de participer à ses soins avec l'équipe (faire sa toilette, le masser, le nourrir) n'hésitez pas à nous le faire savoir.
- Vous avez rencontré le médecin responsable des soins de votre proche. Si vous avez besoin d'explications complémentaires, n'hésitez pas à les lui demander. Nous savons qu'il peut être difficile de comprendre les termes utilisés par les réanimateurs. Vous pouvez demander des explications aussi aux infirmières. Vous trouverez un glossaire un peu plus loin dans ce livret.
- Votre médecin traitant peut demander des explications et accéder au dossier médical. Il est important de partager et de faire circuler ces informations avec des personnes qui vous aideraient à mieux comprendre.

## **Pour vous aider à mieux comprendre les soins que reçoit votre proche...**

**Sédation:** Il s'agit de l'administration de médicaments assurant un sommeil profond. Elle a la propriété d'éviter la **douleur** et de permettre au malade d'être plus confortable avec le respirateur et de ne pas être agité.

**Cathéter :** Tuyau fin en plastique placée dans une grosse veine du cou ou de la jambe qui permet d'apporter rapidement et efficacement des médicaments, des antalgiques, une perfusion et parfois de la nutrition.

**Sonde gastrique:** Tuyau en plastique placé dans l'estomac pour en aspirer les sécrétions ou pour nourrir artificiellement le malade.

**Hydratation :** Il s'agit de l'apport d'eau sucrée et de sel permettant de répondre aux besoins des malades et éviter qu'ils se déshydratent

**Prise en charge de la douleur :** la douleur peut-être morale ou physique, ainsi l'équipe médicale a 2 moyens d'y répondre. Si la douleur est physique, nous administrons des antalgiques puissants par les perfusions. Si la douleur est morale (angoisse, dépression), nous administrons des médicaments anxiolytiques qui calment les angoisses.

**Accompagnement de la fin de vie :** le but de l'équipe de réanimation est de soigner les patients pour qu'ils guérissent. Mais lorsque les moyens actuels de la médecine ne le permettent pas, notre premier but est alors d'accompagner le patient dans ses derniers moments de vie, pour lui apporter un confort moral, physique et lui éviter toute souffrance.

**Soins palliatifs :** Ils s'opposent aux soins curatifs (qui sont sensés apporter la guérison). Les soins palliatifs apportent au patient du confort, du repos, l'absence de douleur et le bien être psychologique.

**Niveaux de soins adaptés :** Les soins délivrés aux patients sont constamment évalués de manière à juger du bénéfice qu'ils apportent et de leur désagrément éventuel. Ainsi tous les soins futiles à la guérison et qui engendrent des souffrances seront arrêtés.

**Ecoute / Information:** chaque jour, vous serez informés et écoutés par les infirmières et les médecins. N'hésitez pas à prendre rendez-vous avec le médecin. Vous devez avoir le sentiment que vous êtes suffisamment informé et que vous avez exprimé ce que vous souhaitez dire en votre nom ou en celui du patient. Il est possible de prendre rendez-vous avec le chef de service.

## **Et après...**

**La suite du livret sert à vous préparer autant que cela est possible à faire face au deuil d'un être cher. Certaines informations vous seront utiles, d'autres moins.**

### *Après le décès de votre proche*

Nous vous proposons de venir vous recueillir auprès de votre proche, dans sa chambre et en chambre mortuaire. Tous les membres de la famille n'y sont pas prêts ou ne le souhaitent pas au même moment. N'hésitez pas à nous en parler

La toilette est assurée par l'infirmière et l'aide-soignant qui se sont occupés de votre proche. Certaines familles expriment des désirs très personnels : le prendre dans les bras, participer à la toilette, à l'habillage, lire un texte... Nous vous aiderons à les réaliser dans toute la mesure du possible.

A votre demande, un représentant du culte peut être sollicité.

*L'état civil*

La déclaration du décès est effectuée par l'hôpital, dans un délai de 24 heures, auprès de la mairie de la commune où le décès a eu lieu (.....insérer l'adresse adéquate .....).

La Société de pompe funèbre que vous allez devoir choisir pour organiser les funérailles (inhumation, crémation, transport du corps à l'étranger) peut prendre en charge l'obtention des extraits d'actes de décès auprès de la mairie sur présentation du livret de famille.

Vous pouvez obtenir des informations administratives en prenant contact avec le bureau de l'état civil de l'hôpital. Si vous ne pouvez ou ne souhaitez vous déplacer, il est possible qu'un de vos proches s'y rende à votre place.

### *Le devenir du corps*

La décision concernant les obsèques et le devenir du corps de votre proche vous appartient.

Après le décès, le corps de votre proche est conduit à la chambre mortuaire. Le délai légal pendant lequel le corps est maintenu dans le service de Réanimation ne peut excéder dix heures. Sauf transport au domicile ou vers une chambre funéraire, il demeurera en chambre mortuaire jusqu'à la levée de corps et le départ pour son lieu de sépulture.

Il est essentiel que vous preniez du temps pour penser et décider de ce que vous désirez pour les funérailles de votre proche, son inhumation ou sa crémation.

La mise en bière est assurée par les agents de la chambre mortuaire de l'hôpital. Les services de pompes funèbres se chargent d'organiser le transport, l'inhumation ou la crémation. Le coût en est assumé par la famille, mais en cas de difficultés financières, des aides existent sur lesquelles les assistantes sociales peuvent vous renseigner.

Si vous choisissez la crémation, vous devez décider du lieu où sera déposée l'urne contenant les cendres (sépulture, columbarium...). L'expérience montre qu'il n'est souhaitable ni pour vous ni pour vos proches de garder l'urne à votre domicile. De même, il semble préférable de choisir un endroit précis pour déposer les cendres afin de pouvoir vous y recueillir. Mais vous pouvez aussi choisir de les disperser au cimetière dans le Jardin du Souvenir ou en pleine nature.

Si vous envisagez l'abandon du corps, parlez-en avec quelqu'un en mesure de réfléchir avec vous sur ce que cela implique dans l'immédiat et pour plus tard ; vous pouvez vous adresser à l'un des agents de la chambre mortuaire ou à un médecin du service.

Accordez-vous au moins 24 heures de réflexion avant de vous décider.

### *La chambre mortuaire*

La chambre mortuaire est un service de l'hôpital qui reçoit et prend soin des corps des personnes décédées et qui permet aux familles de disposer du temps nécessaire à l'organisation des obsèques.

Vous pouvez aller, vous et votre entourage, vous recueillir auprès de votre proche, autant de fois que vous le désirez. Renseignez-vous sur les horaires et jours d'ouverture.

L'équipe de la chambre mortuaire est là pour vous assister et vous accompagner jusqu'aux obsèques de votre proche. N'hésitez pas à leur demander conseil, à leur poser toutes vos questions et leur adresser vos requêtes.

Vous pouvez leur confier des vêtements que vous aurez choisis et participer à la préparation du corps.

A votre demande, la liste des services de pompes funèbres vous sera remise. La chambre mortuaire permet le respect des différents cultes et rites. Les agents de la chambre mortuaire tiennent à votre disposition les coordonnées de représentants du culte.

### *Les rites funéraires*

Les rites funéraires sont très importants pour vous aider à accompagner votre proche à son dernier repos, à lui offrir un dernier hommage. Les rites répondent à un besoin, et l'expérience montre que les personnes y trouvent un réconfort. Vous choisirez sans doute ces rites selon vos croyances religieuses, votre culture et vos habitudes familiales.

Vous avez à organiser, en collaboration avec l'opérateur funéraire et les représentants de votre culte le service funéraire.

Ce temps de célébration, qu'il soit ou non religieux, est organisé pour vous et votre proche. Il peut aider à symboliser sa perte pour vous et ceux qui partagent votre deuil. Ces moments précieux seront inscrits dans votre mémoire votre vie durant, et sont un étape importante dans votre deuil.

Si vous n'appartenez à aucun culte, vous pouvez choisir d'autres rites qui auront des fonctions similaires à celles des rites religieux. Prenez votre temps pour explorer toutes les alternatives.

### *L'autopsie*

Le médecin a peut-être déjà évoqué avec vous l'importance de procéder à une autopsie afin d'aider à clarifier les causes du décès. Sachez que celle-ci ne peut être réalisée qu'avec l'accord de la famille et qu'en cas de refus de votre part votre volonté sera toujours respectée, sauf s'il appartient à la justice d'en décider autrement.

L'autopsie est pratiquée à l'hôpital. Elle constitue un acte médical effectué par des médecins spécialistes, dans le respect du corps de votre proche.

Les résultats de cette autopsie vous seront transmis, soit par le médecin hospitalier, soit par le médecin traitant.

Rappelez-vous que plusieurs mois peuvent s'écouler avant que l'on puisse disposer de l'ensemble des résultats.

*Les pages suivantes ont été écrites à partir de témoignages de familles ayant perdu leur proche. Ils nous ont dit avoir apprécié que leur soit expliqué, au moins en partie, le processus de deuil. C'est un travail complexe, souvent épuisant, mais nécessaire afin d'être capable de survivre à cette perte. N'oubliez pas de faire part à l'équipe de tout ce que vous souhaitez, de ce que vous ressentez, et de tout ce que nous pourrions faire pour vous aider.*

## **Quelques repères sur le chemin de votre deuil**

### *Le moment du décès*

Quelle que soit la durée de la préparation accordée aux familles, le moment même de la mort du proche reste le choc le plus fort, celui qui est ressenti presque plus physiquement qu'intellectuellement, un moment de déchirure intérieure intense.

Votre proche est mort et vous êtes là sans comprendre ce qui vous arrive. Les personnes témoignent d'un état d'anesthésie, de sidération, d'un choc émotionnel intense, qui les laissent incapables de réagir. Vous pouvez exprimer du remord et de la culpabilité, faites nous en part ou faites en part à votre médecin de famille. C'est un sentiment qui survient fréquemment au moment de la perte d'un proche et qui peut s'atténuer en demandant des explications et des précisions sur les circonstances de la maladie de votre proche.

La mort du proche est une rupture dans l'existence qui vient bouleverser les repères de vie jusqu'alors établis. Le temps semble s'arrêter.

### *Les funérailles*

Les funérailles représentent un moment plein d'émotions qui peut sembler insupportable parce qu'il manifeste la séparation définitive. Mais elles permettent de dire au revoir et d'être entouré d'affections.

Prenez le temps de réfléchir à ce qui est important pour vous, à la façon dont vous désirez que se déroulent les obsèques de votre proche, conformément à vos croyances, à vos souhaits. Les funérailles permettent de partager avec votre entourage votre peine et l'au revoir que vous adressez à votre proche. Vous pouvez, si vous le désirez, prendre la parole, ou demandez à des proches de le faire pour vous.

Faites ou faites faire ce que vous sentez ou ce que vous voulez qu'il soit fait. Vous pouvez vous faire aider par les personnes qui vous sont proches ; parlez-en avec elles.

Rappelez-vous qu'il n'est jamais trop tard pour commémorer votre proche. Si vous n'avez pas eu l'occasion de le faire au moment du décès, vous pouvez choisir un autre moment qui vous sera approprié.

*Le travail de deuil*

Le travail de deuil correspond à une période très particulière, un cheminement personnel fait de déséquilibres et d'un travail intérieur qui vous fera osciller entre des moments où vous souffrirez et d'autres où vous irez mieux.

Ces moments se succèdent et se mêlent de façon différente en fonction de facteurs personnels et culturels. Ce cheminement prend du temps et demande beaucoup d'énergie.

Dans cette démarche, le lien humain est fondamental. Il est essentiel de chercher des personnes auxquelles vous pourrez parler. Mais sachez aussi vous protéger. Certaines personnes seront une aide, d'autres non. La proximité du lien familial n'est pas le garant d'un soutien efficace.

**Vous allez être confronté, au fur et à mesure de votre cheminement, à différents ressentis, doutes, questionnements, colères...**

### **Une impuissance**

Les personnes peuvent se sentir vidées de toute substance, anéanties ; elles ont l'impression d'être des automates, de n'être raccrochées à la vie que par le fil de l'habitude.

### **Un déni**

Il arrive que l'un des membres de la famille essaie de nier la terrible réalité. Ce déni peut se manifester en faisant comme si le proche était encore présent. Cette période, généralement passagère, permet de se laisser un peu de temps avant d'affronter une réalité trop douloureuse. Elle étonne certains et rend plus difficile la communication avec les proches.

### **Des troubles physiques**

Votre douleur physique, émotionnelle, peut s'inscrire dans votre corps. Le corps entier peut vous faire mal. Sentiment de malaise diffus, insomnie, maux d'estomac, de tête, perte d'appétit... Tout votre organisme peut traduire votre souffrance. Vous pouvez vous sentir comme ralenti dans vos gestes et votre pensée, votre énergie étant tournée vers l'intérieur. Toutes vos pensées sont pour votre proche. D'autres au contraire peuvent être pris d'un besoin d'activité intense dans tous les domaines de la vie. N'en ayez ni honte ni peur.

### **Une révolte, une colère**

Des sentiments et questionnements s'imposeront à vous : sentiment de révolte et d'injustice face à la perte de votre proche, recherche d'un coupable à qui l'on pourrait en vouloir. Incompréhension et recherche d'un sens, d'une explication, interrogations incessantes adressées à soi même ou à l'autre...

### **Une culpabilité**

Dans le désir de comprendre ce qui s'est passé vous pourrez vous sentir coupable, en pensant à ce que vous avez fait ou n'avez pas fait. Beaucoup de personnes considèrent la culpabilité comme la souffrance la plus grande, la plus longue et la plus complexe. Parlez en aux personnes qui vous sont chères et à l'équipe.

### **Une souffrance au quotidien**

La vie quotidienne est pleine de petits événements qui réveilleront votre souffrance vous rappelant l'absence de votre proche. La confrontation avec des lieux encore pleins de la présence de votre proche, la vision d'une famille heureuse, les fêtes de famille, tous ces événements peuvent raviver votre douleur.

Il est important de partager votre souffrance avec votre entourage, votre famille, vos amis. Permettez-vous de pleurer, de vous faire mater. Certaines personnes ont le sentiment de régresser ; cela n'est pas grave.

Sachez que tout le monde n'est pas capable de partager avec vous ces souvenirs. Certains peuvent être maladroits et cela peut faire mal.

Progressivement, fixez-vous de petits objectifs à accomplir au quotidien (préparer un repas, sortir faire un achat, lire un article de journal...)

**Une solitude, un désespoir**

En proie à une détresse morale intense vous pouvez vous sentir désespéré, déprimé, n'ayant plus goût à rien, appréhendant avec angoisse la journée à venir. Accablé par votre souffrance, vous croyez devenir fou ou pouvez désirer mourir. Tous ces sentiments témoignent de l'intensité de votre douleur et de votre détresse. S'ouvrir aux autres est alors très important, mais révéler sa souffrance à autrui n'est pas chose facile. N'hésitez pas à demander l'aide d'une personne compétente comme un psychiatre, un psychologue.

### *Vers l'appivoisement de l'absence*

Ce travail d'appivoisement de l'absence est long et difficile. Il faut se laisser du temps, être tolérant vis-à-vis de soi et des autres, car ce cheminement comporte des avancées mais aussi des retours en arrière.

Des obstacles sont à dépasser, des caps à franchir.

Faire son deuil ce n'est pas oublier, c'est admettre que la vie est désormais autre, vivre avec la cicatrice laissée par la perte de son proche. Un lien différent est à établir avec son proche, qui passe par l'intégration de sa perte.

*Le couple*

Le couple peut souffrir aussi. Cette épreuve peut réveiller des sentiments forts mais aussi contradictoires qui peuvent rapprocher, éloigner. Au sein de votre couple, vous n'éprouverez pas les mêmes sentiments en même temps. Cela peut être à certains moments une aide. Mais ces différences de vécu peuvent également perturber votre relation, le partage de vos peines respectives s'en trouvant encore plus difficile.

Pour beaucoup d'hommes il est très difficile, voire impossible de s'autoriser à exprimer sa souffrance. En effet dans notre société, l'homme se donne peu le droit de montrer sa peine. Aussi il faut accepter de verbaliser sa peine, le conjoint peut aider.

Mais dans tous les cas, chaque conjoint devra essayer de respecter le cheminement de l'autre.

*L'information aux enfants*

Les enfants ont besoin d'une information claire, vraie et simple.

Il est préférable de leur annoncer le décès et non pas d'attendre qu'ils le comprennent d'eux-mêmes. Beaucoup d'enfants ne pleurent pas, semblent écouter d'une oreille distraite, voulant retourner aussitôt à leurs occupations. Ils ont quand même entendu.

Encouragez-les à s'exprimer, à vous faire part de ce qu'ils ressentent quand ils le voudront.

Les enfants ont eux aussi leur propre travail de deuil à mener. Les modes d'expression de leur souffrance sont variés: tristesse, anxiété, colère, perte d'appétit, troubles du sommeil, agressivité, renfermement mais aussi déni ou apparente indifférence...

La représentation de la mort évolue avec l'âge, le vécu du deuil sera donc différent d'un âge à l'autre. Vous pouvez être clair sur le fait que tout le monde meurt. Ne comparez pas la mort au sommeil ou un départ en voyage, cela pourrait susciter des craintes, des difficultés d'endormissement, des peurs lors de voyages ultérieurs. Vous pouvez dire que quand on est mort, on ne bouge plus, on ne respire plus et on ne sent plus rien.

Rassurez-les sur le fait que la mort n'est pas une punition ni une vengeance et qu'ils ne sont pas responsables, même s'ils se sentent coupables de la mort du proche.

Ne pas leur faire porter votre deuil exigera de votre part beaucoup d'efforts, et au départ, vous aurez l'impression de ne pas être très naturel. Ces efforts pour ne pas craquer, pour paraître gai, que vous impose la présence de vos enfants vont marquer le début de vos retrouvailles avec la vie.

*L'information à sa famille, à ses amis*

Confrontés à ces difficultés, certains de vos amis ou membres de votre famille, mal à l'aise, choisissent le silence, font comme si de rien n'était ou n'osent plus en parler avec vous. Cela pourra vous blesser profondément.

Protégez-vous. N'en parlez qu'aux personnes que vous jugez capables de vous écouter. Vous aurez à guider votre famille, vos amis. Vous avez envie de parler de votre proche, d'évoquer avec eux les bon moments passés ? Dites-le leur ! Vous ne voulez plus parler du passé, vous préférez vous changer les idées, faire des projets nouveaux, vous tourner vers l'avenir ? Dites-le leur également ! Ils ne peuvent pas deviner ce que vous ressentez...

## **Votre proche est mort, Comment continuer à vivre ?**

- Donnez-vous le droit d'avoir du chagrin, d'exprimer votre tristesse et de pleurer. Vous n'êtes ni fragile, ni anormal. Vous êtes en deuil.
- Acceptez de vous sentir limité. Le deuil demande beaucoup d'énergie et vous êtes souvent fatigué. Cela est normal.
- Ne vous isolez pas. N'hésitez pas à dire à votre entourage (famille, ami(e)s) comment vous désirez vivre ce temps : en parlant de votre proche ou, au contraire en vous changeant les idées....
- Prenez soin de vous. Vous n'avez pas eu l'habitude de vous écouter, de vous occuper de votre corps ? Le deuil est un temps de vie où cela est indispensable.
- Apprenez à repérer les personnes et les activités qui vous font du bien. Favorisez ces rencontres et programmez ces activités.

- Ne soyez pas trop ambitieux. Fixez-vous des objectifs simples et accessibles. Ne visez pas trop haut. Dites : « Je vais faire un vrai repas aujourd'hui » ou « Je fais une promenade jusqu'au parc » ou « Je nage une heure » plutôt que « Il faut que j'aille mieux ». Chaque petite victoire sur la tristesse vous remet sur le chemin de la vie.

- Vous vous sentez coupable de la mort de votre proche ? Parlez-en et ne laissez pas la culpabilité devenir obsessionnelle au point de vous empêcher de vivre. Vous êtes un être humain et, à ce titre, vous n'êtes pas parfait. Si vous acceptez vos imperfections, votre culpabilité prendra alors une dimension existentielle, c'est-à-dire qu'elle vous permettra de vous reconnaître humain et limité.

- Il est normal qu'à certains moments vous n'ayez pas envie de parler de votre proche et que vous appréciez de vous retrouver dans un lieu où personne ne sait ce qui vous est arrivé. Parfois, vous éprouverez le sentiment fugace d'être à nouveau heureux. Ne culpabilisez pas. Cela ne signifie pas que vous trahissez votre proche.

- Les personnes qui vous entourent croiront vous aider en vous donnant de nombreux conseils. Certains seront adaptés, d'autres pas. N'oubliez pas que vous seul savez ce qui est bon pour vous. Ne laissez pas les autres vous dicter votre conduite.

- Remettez à plus tard les grandes décisions qui pourraient changer définitivement le cours de votre vie : changer de travail, déménager, divorcer, partir à l'étranger. Reconnaissez que vous n'êtes momentanément pas en état de prendre des décisions que vous pourriez regretter plus tard.
- Il se peut que vous rencontriez plus de difficultés que vous ne le pensiez au cours de votre deuil, que vous ne trouviez pas autour de vous l'aide espérée.
- Demandez l'aide de votre médecin généraliste. Lui seul décidera des médicaments dont vous avez besoin (antidépresseur ou somnifères).
- Par ailleurs, n'hésitez pas consulter un psychiatre ou un psychologue. Cela ne signifie pas que vous devenez fou ou incapable. Il est normal d'éprouver des difficultés à vivre une perte difficile et d'avoir besoin de recourir à une écoute professionnelle qui soit émotionnellement plus neutre que celle d'un proche.

## Où trouver de l'aide ?

- Auprès de notre équipe : médecins, cadres infirmiers, infirmières, psychiatre, psychologue...

Vous pouvez nous solliciter dès à présent ou plus tard, en fonction de vos besoins.

- Auprès d'une association qui vient en aide aux personnes endeuillées

N'hésitez pas à vous renseigner auprès d'une ou plusieurs associations. Un ouvrage propose une liste très complète des associations venant en aide aux personnes endeuillées : « Vivre le deuil » d'Emmanuel Moreau, éditions Jacob Duvernet / guide France Info, 2001.

## **Bibliographie**

Voici quelques ouvrages pouvant vous guider dans votre cheminement personnel.

« Aimer, perdre, grandir, assumer les difficultés et les deuils de la vie »

Jean Monbourquette, Bayard / Centurion, 1995

Ce livre est un livre compagnon, pas un traité ni un essai. Conçu avant tout comme un guide, il s'adresse particulièrement au cœur.

« Le deuil. Comment y faire face ? Comment le surmonter ? »

Nadine Beautheac, Seuil, 2001

Les pistes concrètes et les informations données tout au long de ce livre permettront à ceux et celles qui sont confrontés à un deuil de comprendre l'importance de pouvoir vivre ces jours si particuliers selon leurs désirs.

« Quand le deuil survient. 80 questions et réponses »

Roger Régnier et Line Saint-Pierre, Sciences et culture, Montréal, 2000

Dans ce livre, les auteurs répondent aux questions qui leur sont le plus fréquemment posées afin d'apporter information, soutien et réconfort aux personnes en deuil.

« Vivre le deuil au jour le jour : réapprendre à vivre après la mort d'un proche »

Dr Christophe Faure, J'ai lu, 2001

Aide à mieux comprendre le deuil et les sentiments qu'il génère, permet de mieux accompagner celui qui souffre. Ce guide psychologique est à l'usage des personnes endeuillées et de leur entourage.

« Parler de la mort »

Françoise Dolto, Mercure de France, 1998

Le texte d'une conférence sur divers thèmes : comment parler de la mort avec ceux qui vont mourir, avec ceux qui n'ont plus envie de vivre, avec ceux qui ont perdu un être cher, et comment en parler aux enfants.

## Glossaire

*Amphithéâtre des morts, Morgue, Chambre mortuaire, Funérarium*

Lieu spécialement aménagé dans les institutions hospitalières ou spécialisées pour garder le corps d'une personne décédée et permettre à sa famille et à ses proches de venir lui rendre visite avant les funérailles.

*Columbarium*

Endroit spécial du cimetière où sont conservées les urnes des personnes crématisées.

*Commémorer*

Rappeler par une cérémonie le souvenir d'une personne ou d'un événement.

*Crémation, incinération*

Action de brûler le corps des morts. Les cendres de la personne sont mises dans une urne.

*Funérailles, obsèques, service funéraire*

Ensemble des cérémonies accomplies pour rendre les derniers devoirs au corps d'une personne décédée.

*Inhumation, Enterrement*

Ensevelissement, action de mettre le corps dans la terre.

*Jardin du Souvenir*

Pelouse fleurie dans un cimetière, où l'on disperse les cendres du défunt si telle est sa volonté

*Levée du corps*

Moment où la famille se recueille une dernière fois auprès du défunt avant la mise en bière et avant son départ de l'hôpital ou du domicile

*Mise en bière*

Action de mettre le corps de la personne décédée dans le cercueil

*Présentation du défunt*

Le défunt est exposé en chambre mortuaire à l'hôpital ou au funérarium, pour que la famille puisse venir se recueillir auprès de lui.

*Rites funéraires*

Ensemble de pratiques, de gestes particuliers au caractère sacré ou symbolique aidant les personnes dont un proche est décédé, à lui dire adieu.

*Sépulture*

Ce mot a deux significations :

- lieu où est déposé le corps du défunt (fosse, tombe, tombeau)
- inhumation, considérée surtout dans les formalités et les cérémonies qui l'accompagnent.

*Toilette du corps, Préparation du corps*

Soins et habillage réalisés en chambre mortuaire avant la levée du corps
